# Supplementary material
Source: PubMed Central journal article supplement (PMC365758)

83\_1

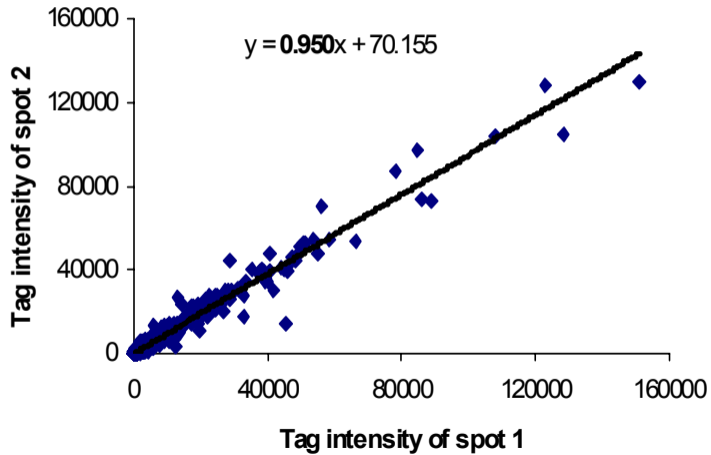

Supplement: pnas_101_9_3148__13.pdf [file pnas_101_9_3148__13.pdf]

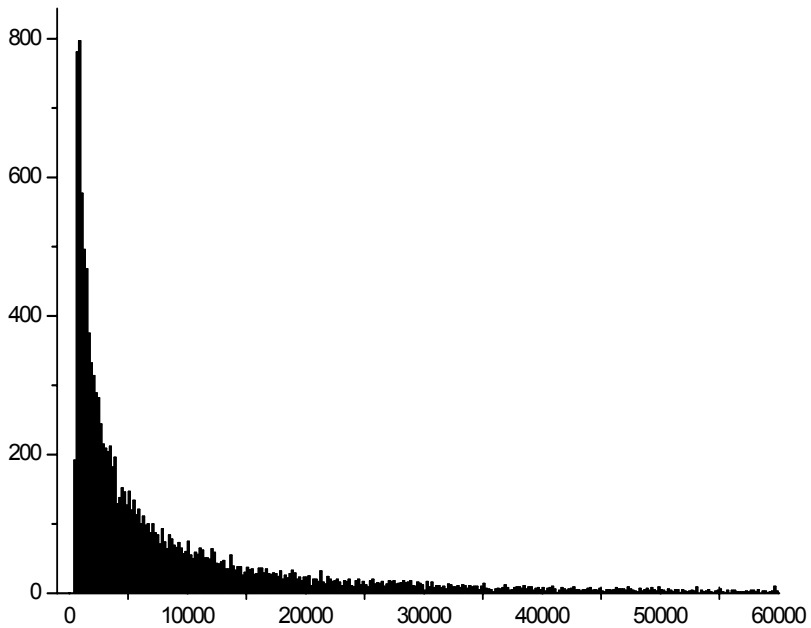

Supplement: pnas_101_9_3148__23.pdf [file pnas_101_9_3148__23.pdf]

**(a) 83\_1\_2**

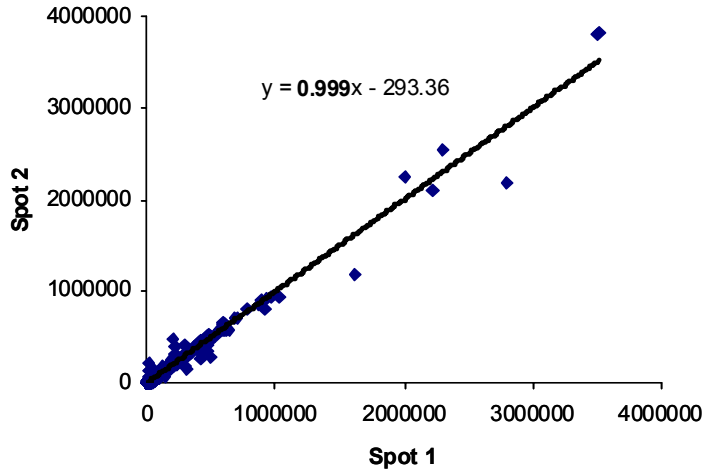

**(b) 83\_1\_2 lower intensity spots**

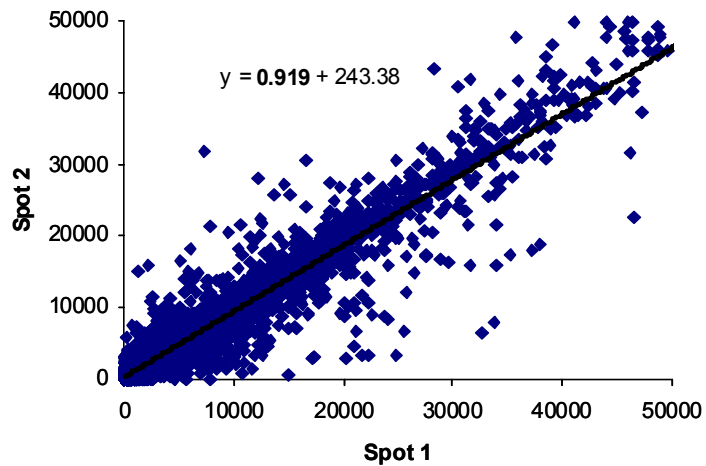

Supplement: pnas_101_9_3148__25.pdf [file pnas_101_9_3148__25.pdf]

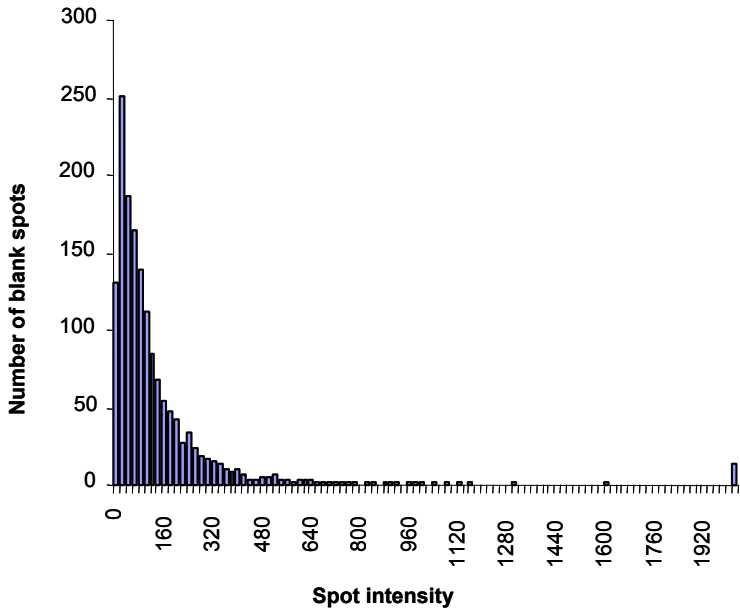

Supplement: pnas_101_9_3148__27.pdf [file pnas_101_9_3148__27.pdf]

**(a) 83\_1\_2**

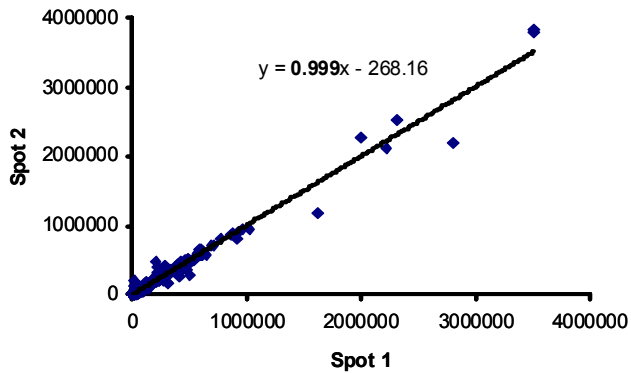

**(b) 91\_8\_3**

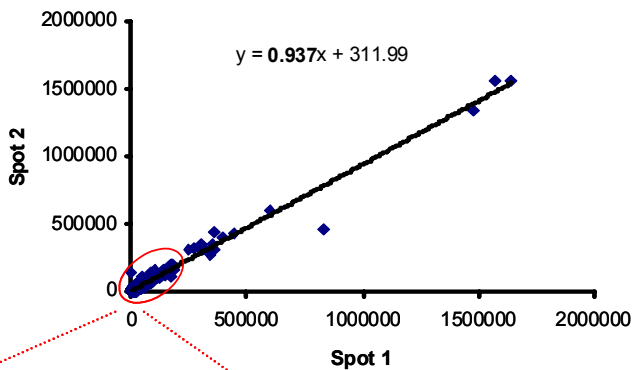

**(c) 91\_8\_3 medium to low intensity spots**

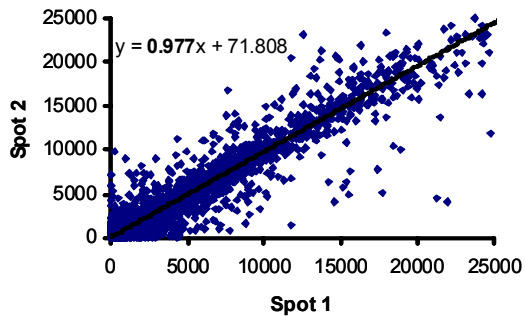

**(d) 91\_8\_3 excluding two outliers**

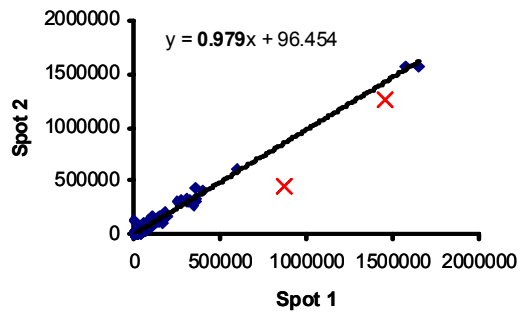

Supplement: pnas_101_9_3148__7.pdf [file pnas_101_9_3148__7.pdf]
